# Supplementary material for: Structure and DNA cleavage properties of two copper(ii) complexes of the pyridine-pyrazole-containing ligands mbpzbpy and Hmpzbpya
Source: Royal Society of Chemistry journal article supplement (doi:10.1039/b704390b), 2007-01-01

## Supplementary Information

**Dalton Trans March 2007**

**Accompanying:**

**Structure and DNA cleavage properties of two copper(II) complexes of the pyridine-pyrazole-containing ligands mbpzbp and Hmpzbp.**

Palanisamy Uma Maheswari,<sup>[a]</sup> Kristian Lappalainen,<sup>[a]</sup> Michael Sfregola,<sup>[a]</sup> Sharief Barends,<sup>[a]</sup> Patrick Gamez,<sup>[a]</sup> Urho Turpeinen,<sup>[b]</sup> Ilpo Mutikainen,<sup>[b]</sup> Gilles P. van Wezel<sup>[a]</sup> and Jan Reedijk<sup>[a]\*</sup>

### Table of contents

|                                                                                                                                                                                                    |        |
|----------------------------------------------------------------------------------------------------------------------------------------------------------------------------------------------------|--------|
| <b>Figure S1.</b> Representations of complex <b>1</b> showing the weak interactions between the copper(II) ions and two axial bromide anions.                                                      | page 2 |
| <b>Figure S2.</b> Crystal packing of complex <b>1</b> showing the hydrogen bonding network formed between water molecules and the bromide anions.                                                  | page 2 |
| <b>Figure S3.</b> Perspective view showing the plane defined by the atoms N11, N21, and O18 of complex <b>2</b> .                                                                                  | page 3 |
| <b>Figure S4.</b> Crystal packing of complex <b>2</b> showing the strong hydrogen bonding interactions between methanol molecules and the carboxylato units of the ligand. O1–H1A···O19 = 2.715 Å. | page 3 |

**Figure S1.** Representations of complex **1** showing the weak interactions between the copper(II) ions and two axial bromide anions. The Cu⋯Br separation amounts to 3.245 Å.

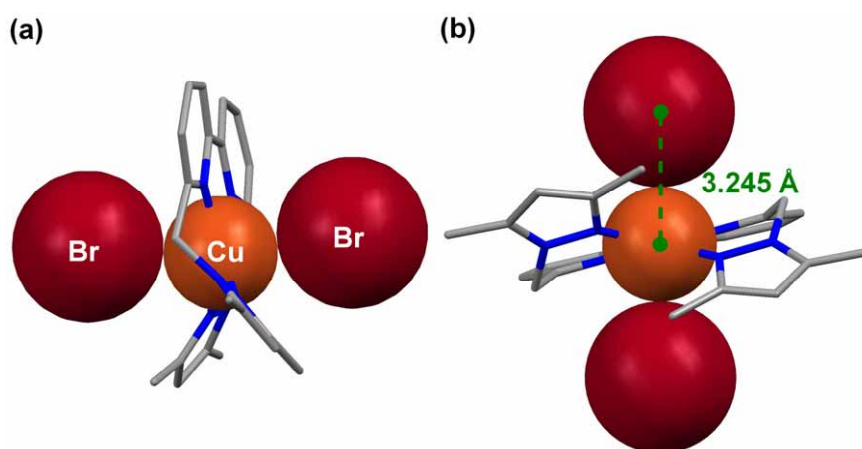

**Figure S2.** Crystal packing of complex **1** showing the hydrogen bonding network formed between water molecules and the bromide anions. Moderate H bonds ranging from 3.369 to 3.453 Å are realized between Br and O<sub>water</sub>.

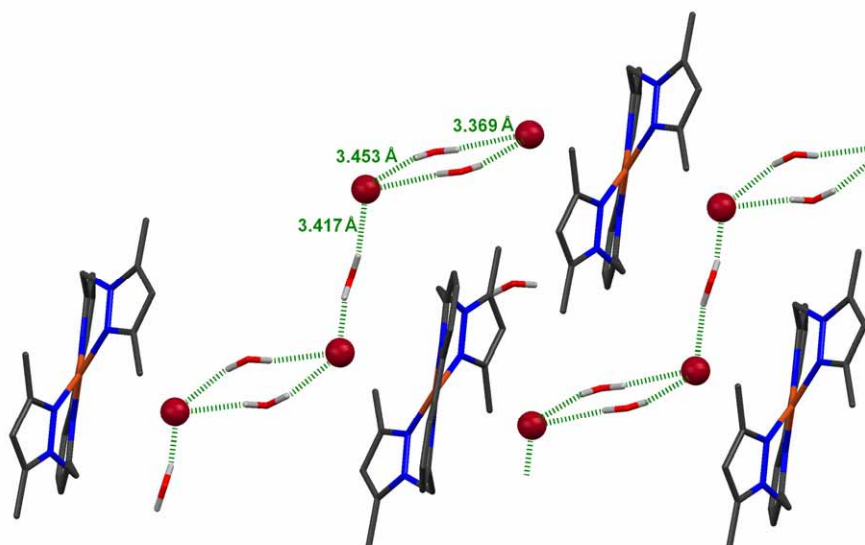

**Figure S3.** Perspective view showing the plane defined by the atoms N11, N21, and O18 for complex **2**. The pyrazole nitrogen N31 is clearly out of this plane (the deviation of N31 from this plane amounts to 33.41°).

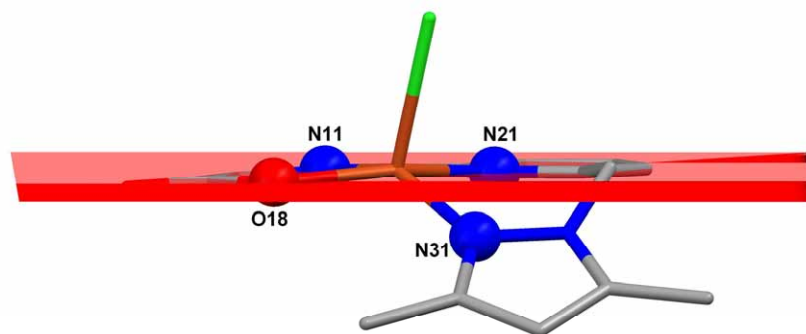

**Figure S4.** Crystal packing of complex **2** showing the strong hydrogen bonding interactions between methanol molecules and the carboxylato units of the ligand.  $O1-H1A \cdots O19 = 2.715 \text{ \AA}$ . Only the H atoms involved in hydrogen bonds are shown for clarity.

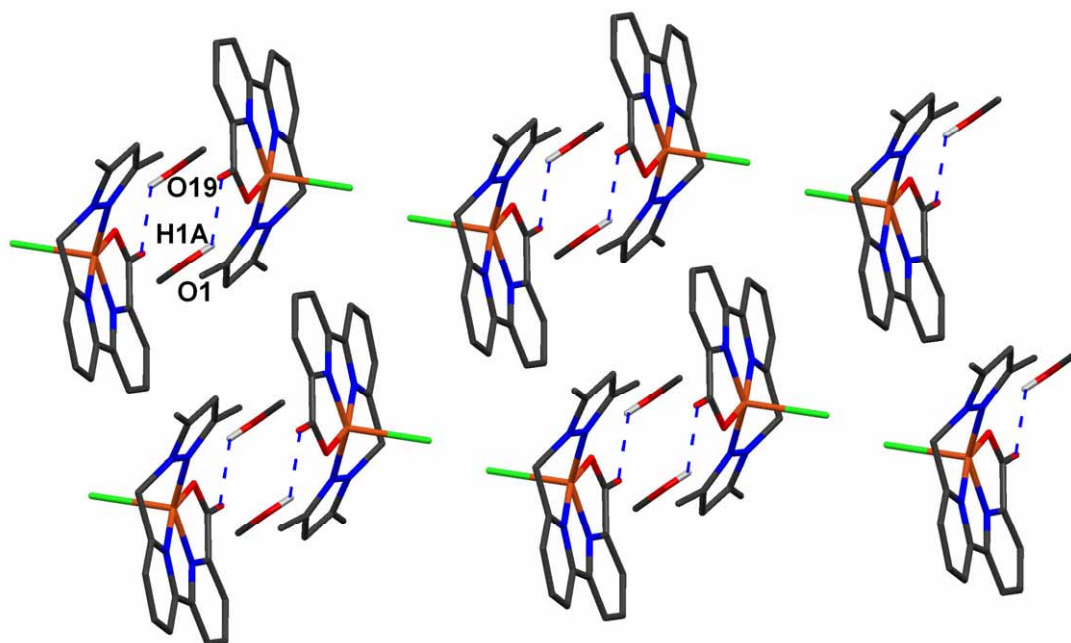

Supplement: b704390b.pdf [file b704390b.pdf]
